# Supplementary material for: Therapeutic Effect of Biomimetic Scaffold Loaded with Human Amniotic Epithelial Cell-Derived Neural-like Cells for Spinal Cord Injury
Source: MDPI journal article supplement (doi:10.3390/bioengineering9100535), 2022-10-09
Supplement: s1 [file s1]

# **Biomimetic spinal cord scaffold loaded with human amniotic epithelial cells-derived neural-like cells repairs spinal cord injury in rats**

**Chen Qiu** <sup>1,2,†</sup>, **Yuan Sun** <sup>3,†</sup>, **Jinying Li** <sup>1,2</sup>, **Yuchen Xu** <sup>4,5,6</sup>, **Jiayi Zhou** <sup>1,2</sup>, **Cong Qiu** <sup>1,2</sup>, **Shaomin Zhang** <sup>4,5,6</sup>, **Yong He** <sup>3,\*</sup> and **Luyang Yu** <sup>1,2,\*</sup>

<sup>1</sup> MOE Laboratory of Biosystems Homeostasis & Protection of College of Life Sciences, Zhejiang University, Hangzhou 310027, China

<sup>2</sup> College of Life Sciences-iCell Biotechnology Regenerative Biomedicine Laboratory, Joint Research Centre for Engineering Biology, Zhejiang University-University of Edinburgh Institute, Zhejiang University, Haining 314400, China

<sup>3</sup> Key Laboratory of 3D Printing Process and Equipment of Zhejiang Province, School of Mechanical Engineering, Zhejiang University, Hangzhou 310027, China

<sup>4</sup> Qiushi Academy for Advanced Studies, Zhejiang University, Hangzhou 310027, China

<sup>5</sup> Key Laboratory of Biomedical Engineering of Ministry of Education, Zhejiang University, Hangzhou 310027, China

<sup>6</sup> Zhejiang Provincial Key Laboratory of Cardio-Cerebral Vascular Detection Technology and Medicinal Effectiveness Appraisal, Zhejiang University, Hangzhou 310027, China

\* Correspondence: yongqin@zju.edu.cn (Y.H.); luyangyu@zju.edu.cn (L.Y.)

† These authors contributed equally.

**Table S1.** Primers used for qRT-PCR in this study.

| <b>Genes</b>            | <b>Forward Primer (5'-3')</b> | <b>Reverse Primer (5'-3')</b> |
|-------------------------|-------------------------------|-------------------------------|
| GAPDH                   | CATTGCCCTCAACGACCACTTTGT      | TCTCTCTCTTCCTCTTGTGCTCTTGC    |
| Pax6                    | GGCAACCTACGCAAGATGGC          | TGAGGGCTGTGTCTGTTCGG          |
| Sox2                    | CATGCACCGCTACGACG             | CCCTGGAGTGGGAGGAAGA           |
| Olig2                   | TGGCTTCAAGTCATCCTCGTC         | CCAGTCGCTTCATCTCCTCC          |
| Nkx6.1                  | ACACGAGACCCACTTTTTCCG         | TGCTGGACTTGTGCTTCTTCAAC       |
| NeuroD1                 | ATGACCAAATCGTACAGCGAG         | GTTTCATGGCTTCGAGGTCGT         |
| Neurofilament<br>(NF-H) | ATTCCTTTCTCGCTTCCAG           | CAGACTTCTCCACCACTTTGAT        |
| Otx2                    | CAAAGTGAGACCTGCCAAAAAGA       | TGGACAAGGGATCTGACAGTG         |
| Map2                    | CCCCTTGCTTCCCTGTAGAA          | ATTCCTCCTGGCAACCTCA           |
| NeuN                    | TTCTATGCAGTGACGGGGTT          | TCCATCCTGATACACGACCG          |

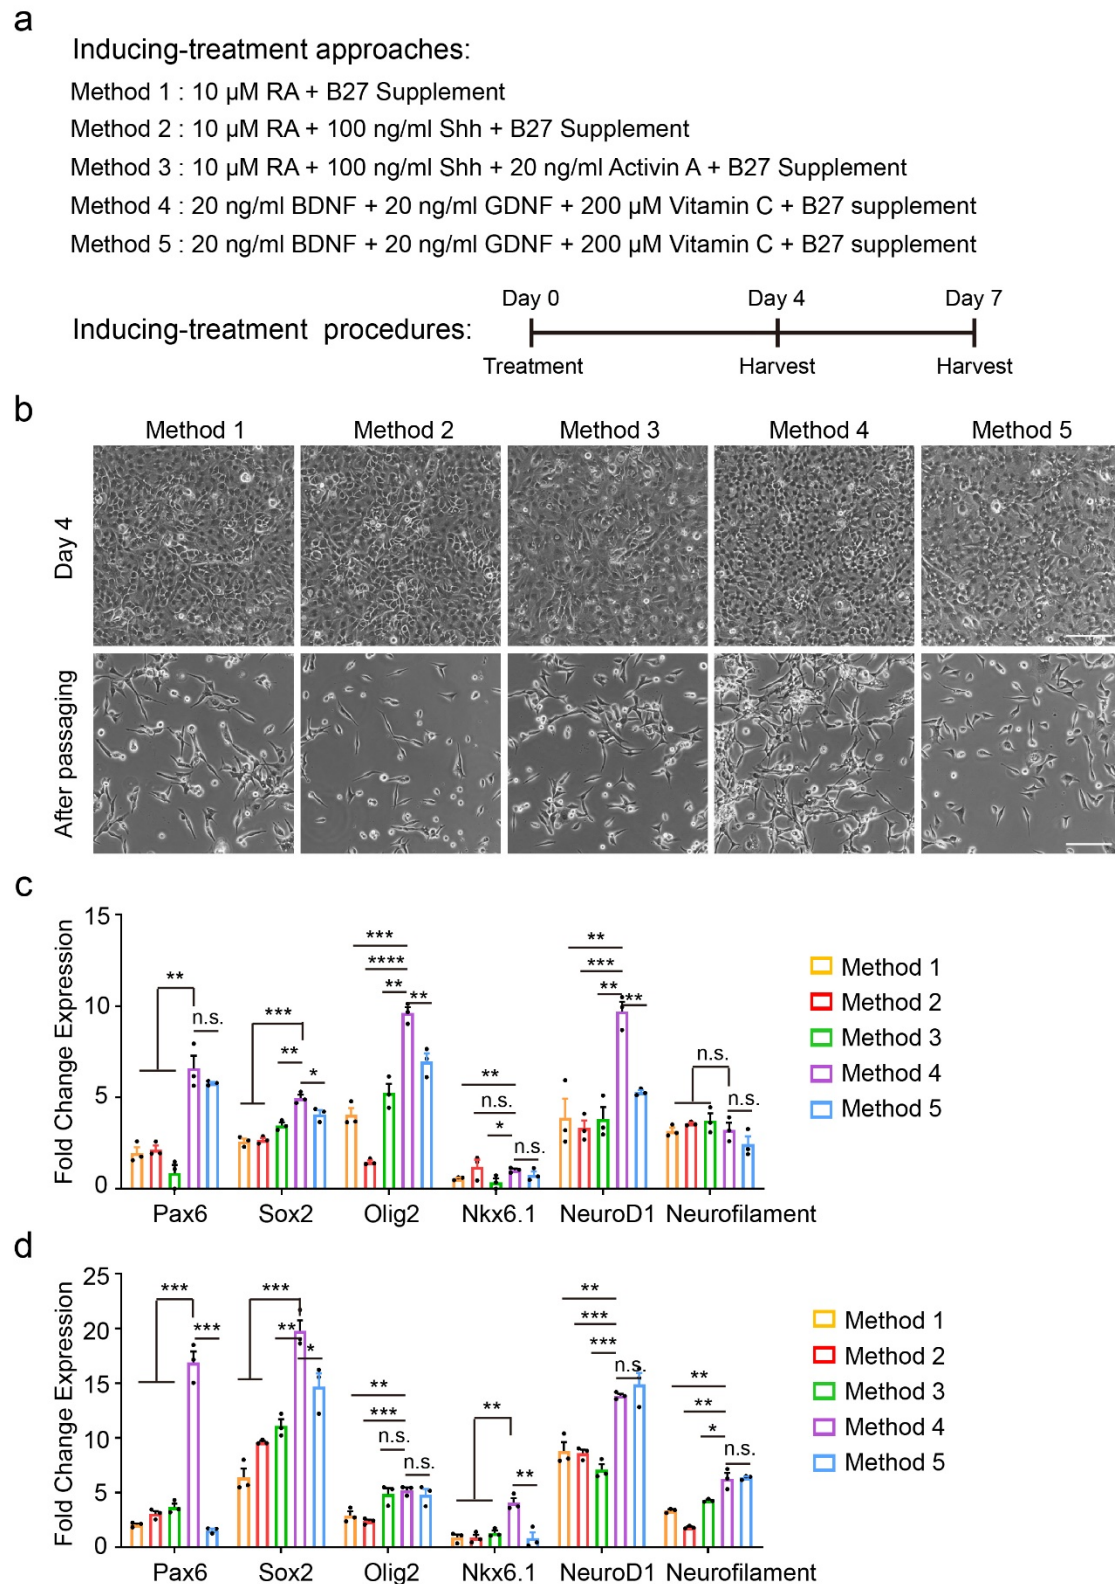

**Figure S1.** The screening of inducing-treatment approaches. (a) Experimental schematic of 5 different inducing-treatment approaches; (b) The observation of cells morphology from indicated treated groups at 4 days and after passing; (c) The mRNA expression of neural markers from all indicated treated groups 4 days after inducing-treatment, normalize the non-treated hAECs as 1, \*\*\*\* $p < 0.0001$ , \*\*\* $p < 0.001$ , \*\* $p < 0.005$ , \* $p < 0.05$ , n.s.: not significant (Unpaired

t-test), n=3; **(d)** The mRNA expression of neural markers from all indicated treated groups 7 days after treatment, normalize the non-treated hAECs as 1, \*\*\*\*p<0.0001, \*\*\*p<0.001, \*\*p<0.005, \*p<0.05, n.s.: not significant (Unpaired t-test), n=3. **Scale bars: b: 100  $\mu$ m.**

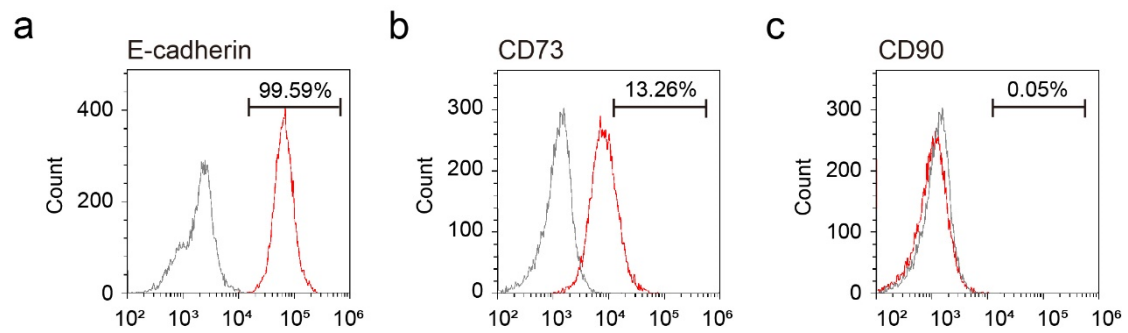

**Figure S2.** The detection of epithelial and mesenchymal properties of hAEC-neural-like cells. **(a-c)** The expression of epithelial marker (E-cadherin) and mesenchymal markers (CD73, CD90) detected by flow cytometry after BGVB inducing treatment.

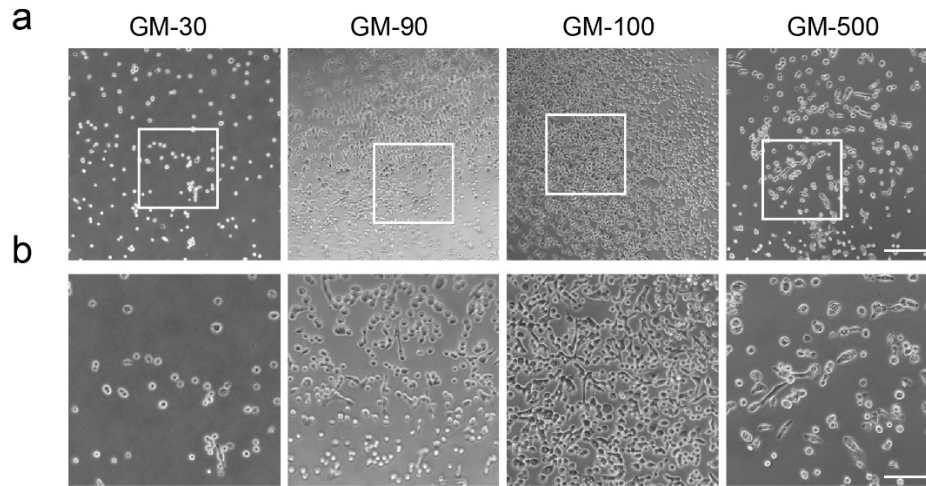

**Figure S3.** The optimization of GelMA substitution degree for hAECs attachment and growth. **(a)** The morphology of hAECs on GelMA surfaces with 4 different substitution degrees; **(b)** The magnified imagings of the white frames in **figure a** from all indicated GelMA surfaces showed the significant difference in cell number and apperance. **Scale bars:** **a:** 100  $\mu\text{m}$ ; **b:** 50  $\mu\text{m}$ .

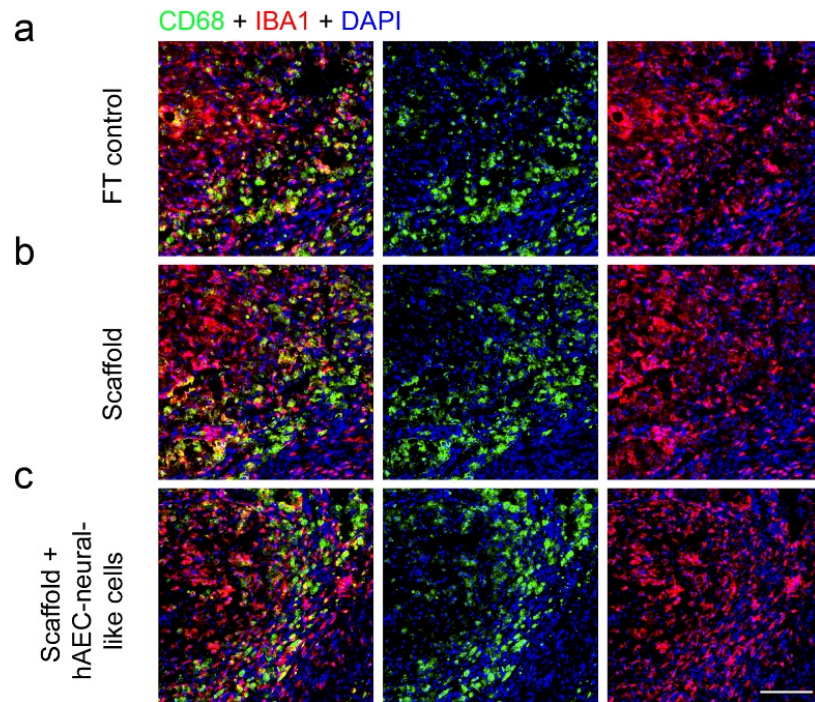

**Figure S4.** The evaluation of inflammation response around lesions from all indicated groups. (a-c) CD68 (green) and IBA1 (red) staining revealed the activation of macrophage and microglia around lesion from different treatment groups; (a) The FT control group; (b) The empty scaffold group; (c) The scaffold + hAEC-neural-like cells group. **Scale bars:** 140  $\mu\text{m}$ .
